# Supplementary material for: CD36 facilitates fatty acid uptake by dynamic palmitoylation-regulated endocytosis
Source: PubMed Central journal article supplement (PMC7505845; doi:10.1038/s41467-020-18565-8), 2020-09-21
Supplement: 41467_2020_18565_MOESM1_ESM.pdf [file 41467_2020_18565_MOESM1_ESM.pdf]

# Supplementary Information

**CD36 Facilitates Fatty Acid Uptake by Dynamic Palmitoylation-Regulated  
Endocytosis**

**Hao et al.**

## Supplementary Figure 1

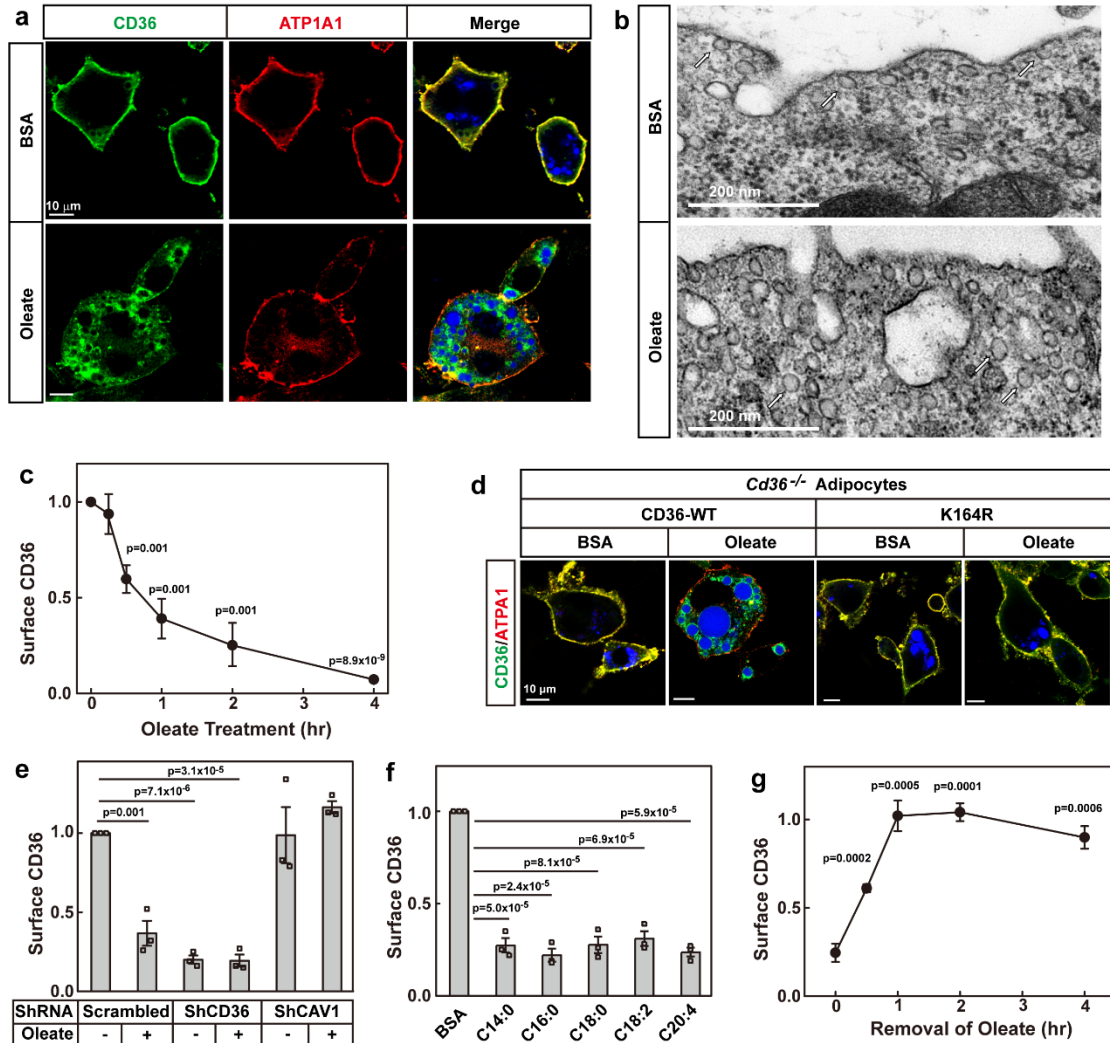

### Supplementary Figure 1. Long-chain fatty acids trigger internalization of CD36

**a**, 3T3-L1 adipocytes were treated as in Fig. 1a with BSA or BSA-conjugated oleate (100  $\mu$ M) for 4 hr. Cells were harvested and subjected to immunostaining using anti-CD36 and anti-ATP1A1 antibodies. **b**, 3T3-L1 adipocytes were treated with BSA-conjugated oleate (100  $\mu$ M) for 1 hr and subjected to electron microscopy analysis. Arrows indicated representative caveolae in each picture. **c**, Quantification of surface content of CD36 in Fig. 1b. Each value represents mean  $\pm$  SEM from 3 independent experiments. The value in BSA-treated cells was normalized to 1.0. Two-sided

Student's t test was performed. **d**, SVFs were isolated from iWAT of *Cd36*<sup>-/-</sup> mice. On Day 6 of differentiation, cells were electroporated with WT or K164R mutant of CD36/pcDNA3.3. On day 7, cells were treated as in Fig. 1a with BSA-conjugated oleate (100  $\mu$ M) for 1 hr, and subjected to immunostaining as in (a). LipidTOX (blue) was used to indicate lipid droplet. **a**, **d**, The scale bars were as indicated. **e-g**, Quantification of surface CD36 content in Fig. 1d (e), Fig.1 f (f) and Fig. 1h (g), respectively. Each value represents mean  $\pm$  SEM from 3 independent experiments. The value in BSA-treated cells was normalized to 1.0. Two-sided Student's t test was performed. The experiment was repeated at least twice. Source data are provided as a Source Data file.

## Supplementary Figure 2

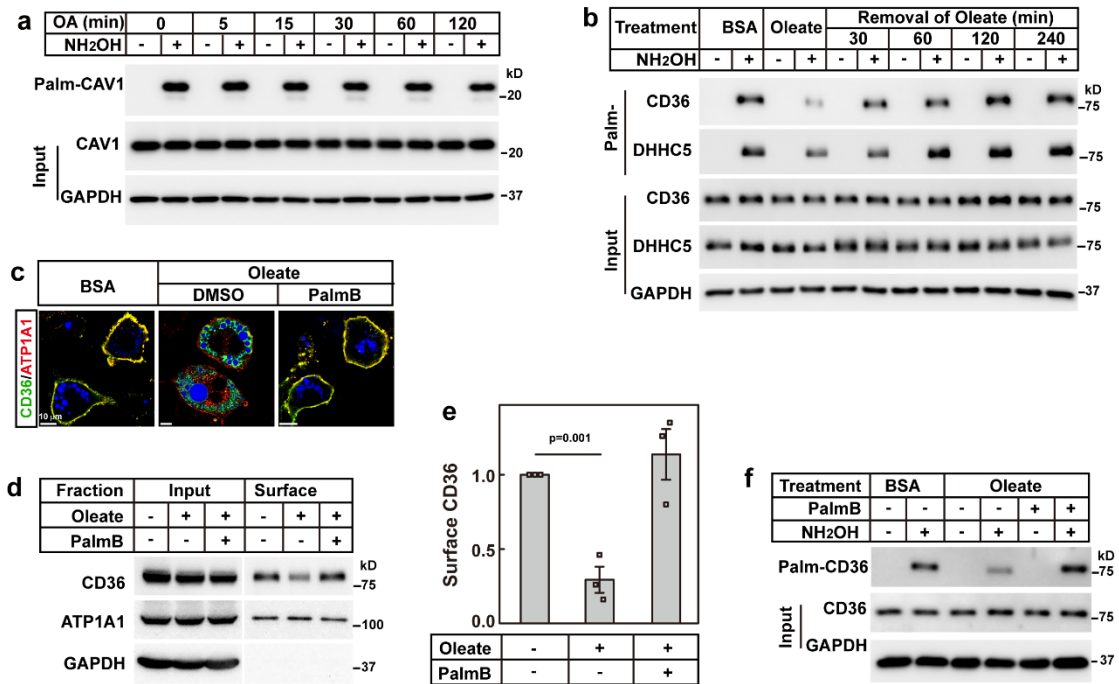

### Supplementary Figure 2. Depalmitoylation of CD36 is required for its internalization

**a**, 3T3-L1 adipocytes were treated and subjected to Acyl-RAC as in Fig. 3a, followed by Western blot with indicated antibodies. **b**, 3T3-L1 adipocytes were treated with oleate for 4 hr, and then switched to serum free medium for indicated time. Cells were harvested for Acyl-RAC analysis. **c-f**, 3T3-L1 adipocytes were pretreated with serum free medium for 4 hr, and DMSO or PalmB (15  $\mu$ M) for 1 hr, followed by BSA or oleate (100  $\mu$ M) treatment for 1 hr. Cells were harvested for immunostaining (**c**), surface biotinylation (**d**, **e**) and Acyl-RAC (**e**) assays. **e**, Each value represents mean  $\pm$  SEM from 3 independent experiments. The value in BSA-treated cells was normalized to 1.0. Two-sided Student's t test was performed between BSA- and oleate-treated cells. These experiments were repeated at least twice. Source data are provided as a Source Data file.

### Supplementary Figure 3

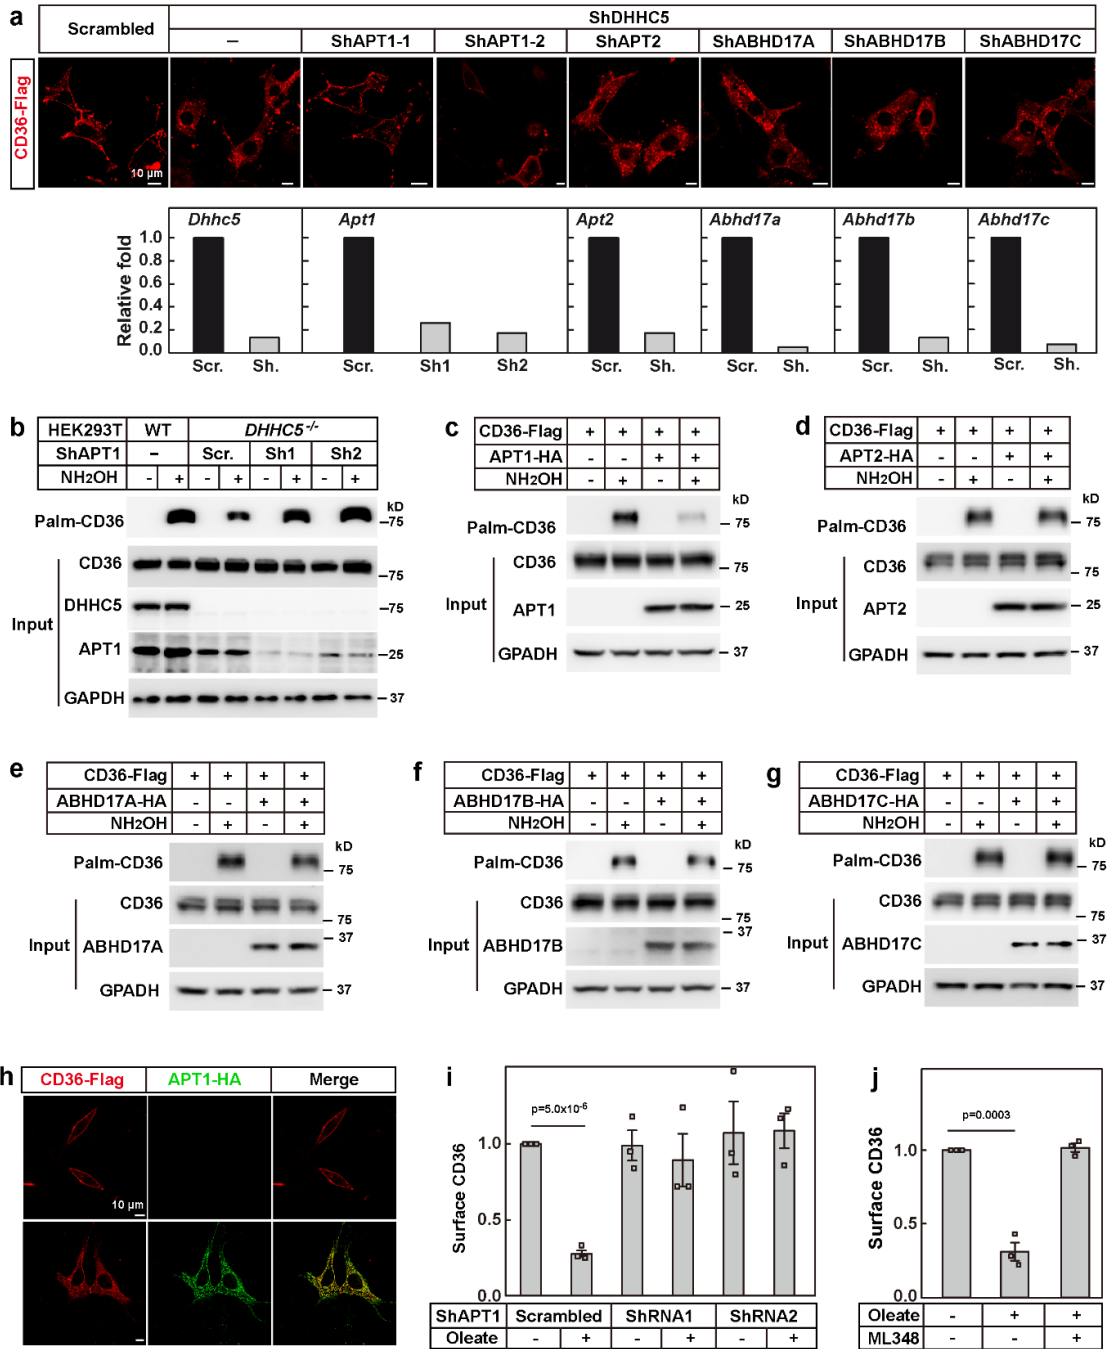

### Supplementary Figure 3. Identification of APT1 as the depalmitoylase of CD36

**a**, On day 0, 3T3-L1 preadipocytes transduced with indicated shRNAs were set up at  $4 \times 10^4$  cells per well in a 6-well plate. On day 2, cells were infected with lentivirus-expressing CD36-Flag. On day 3, cells were harvested for immunostaining with anti-Flag antibody. The knockdown efficiency of each shRNA was shown in the lower panel.

**b**, On day 0, WT or *DHHC5*<sup>-/-</sup> HEK293T cells were infected with scrambled shRNA or each of the two shRNAs of APT1. On day 1, cells were selected with 1 µg/ml puromycin. On day 3, cells were transfected with 1 µg CD36-Flag/pCDH-puro. On day 4, cells were harvested for Acyl-RAC assay and blotted with indicated antibodies. **c-g**, On day 0, HEK-293T cells were set up at  $7.5 \times 10^5$  cells per 6-cm dish. On day 2, cells were transfected with 0.5 µg CD36-Flag/pCDH-puro and/or 0.5 µg of each of the depalmitoylases on a pCDH-puro vector. On day 3, cells were harvested for Acyl-RAC assay and blotted with indicated antibodies. **h**, On day 0, 3T3-L1 preadipocytes were set up at  $4 \times 10^4$  cells per well in a 6-well plate. On day 2, cells were infected with lentivirus-expressing CD36-Flag with or without APT1-HA. On day 3, cells were harvested for immunostaining with anti-Flag and anti-HA antibodies. The scale bars were as indicated. **i,j**, Quantification of surface CD36 content in Fig. 3c (i) and Fig. 3f (j). Each value represents mean  $\pm$  SEM of a triplicate. The value in BSA-treated cells was normalized to 1.0. Two-sided Student's t test was performed. These experiments were repeated at least twice. Source data are provided as a Source Data file.

### Supplementary Figure 4

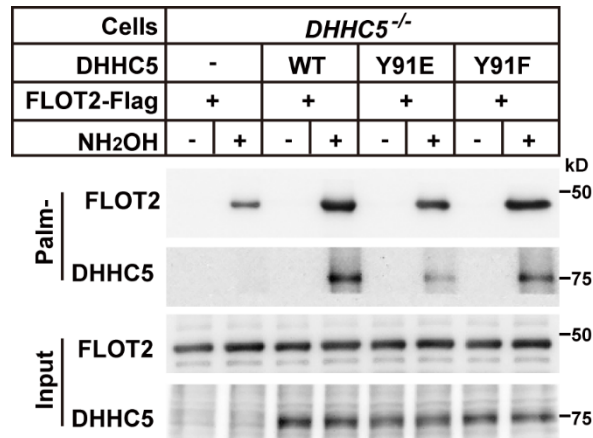

**Supplementary Figure 4. Y91E mutant of DHHC5 showed decreased activity in palmitoylating Flotillin-2.**

*DHHC5*<sup>-/-</sup> HEK-293T cells were set up, transfected and subjected to Acyl-RAC analysis as in Fig. 4f, except that Flotillin-2 (FLOT2) was used as a substrate. This experiment was repeated twice. Source data are provided as a Source Data file.

## Supplementary Figure 5

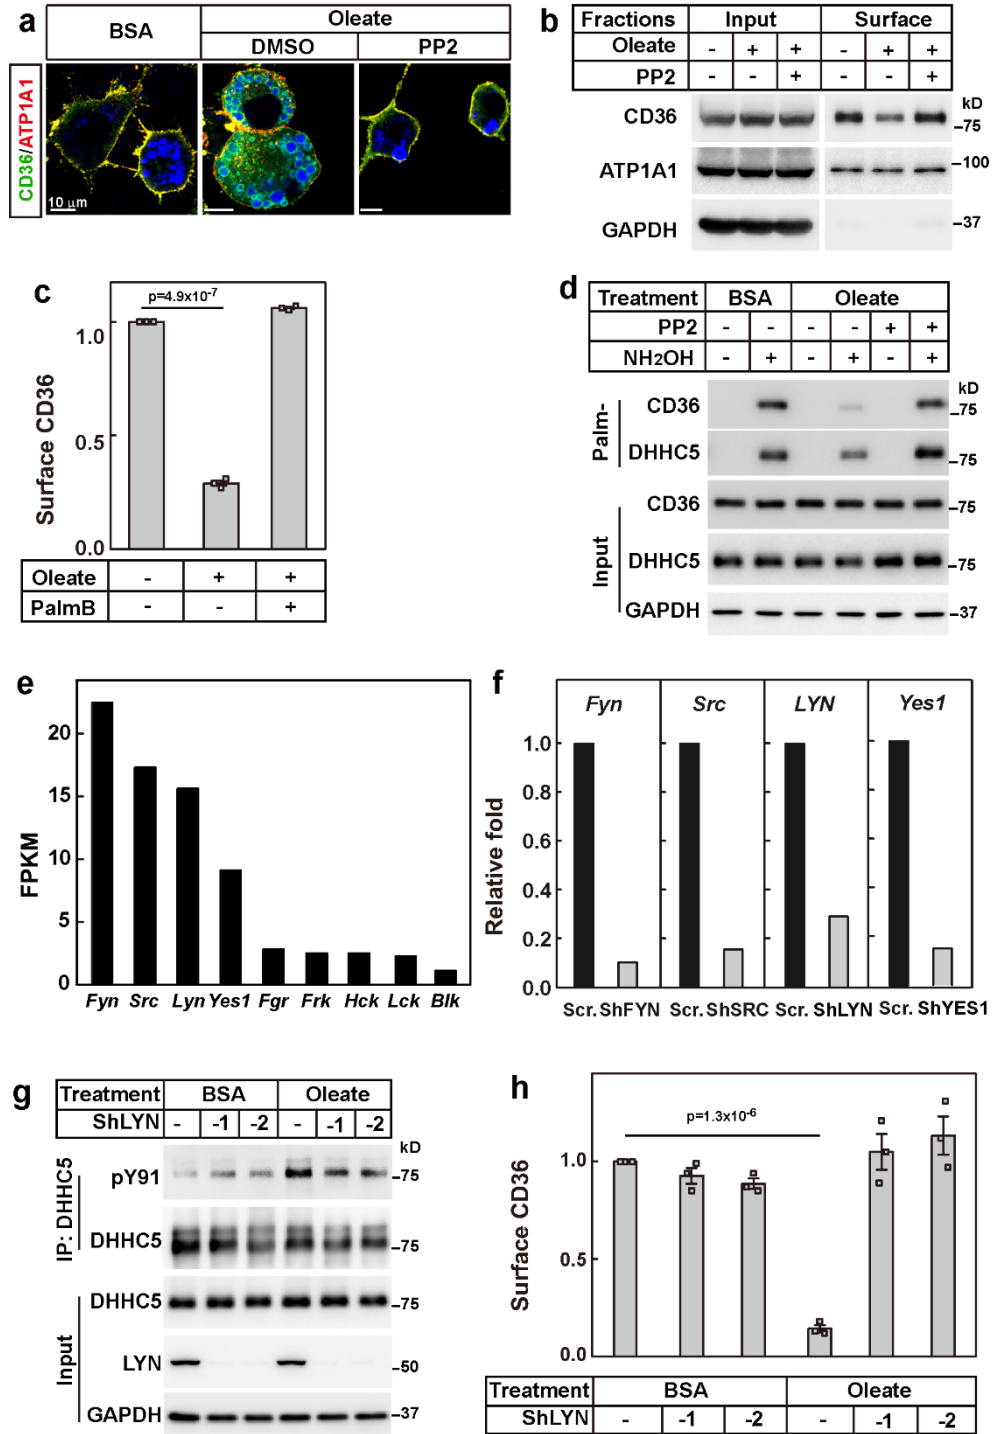

### Supplementary Figure 5. LYN phosphorylates DHH5

a-d, 3T3-L1 adipocytes were pretreated with serum free medium for 4 hr and PP2 (15  $\mu$ M) for 1 hr, followed by treatment with BSA or oleate (100  $\mu$ M) for 1 hr. Cells were



harvested for immunostaining (a), surface biotinylation (b, c) and Acyl-RAC (d) assays. **c**, Each value represents mean  $\pm$  SEM of 3 individual experiments. The value in BSA-treated cells was normalized to 1.0. Two-sided Student's t test was performed. **e**, Expression pattern of SRC family kinases in white adipose tissue. These data were from a RNA-Seq in the white adipose tissue from 8-week-old male C57BL6 mice. **f**, Knockdown efficiency of the shRNAs against indicated SFKs. **g**, Control and LYN knockdown 3T3-L1 adipocytes were pretreated and treated with oleate for 5 min, followed by immunoprecipitation of DHHC5 to detect phosphorylation of DHHC5 (pY91). **h**, Quantification of surface CD36 content in Fig. 5e. Each value represents mean  $\pm$  SEM of 3 individual experiments. The value in BSA-treated cells was normalized to 1.0. Two-sided Student's t test was performed. These experiments were repeated at least twice. Source data are provided as a Source Data file.

## Supplementary Figure 6

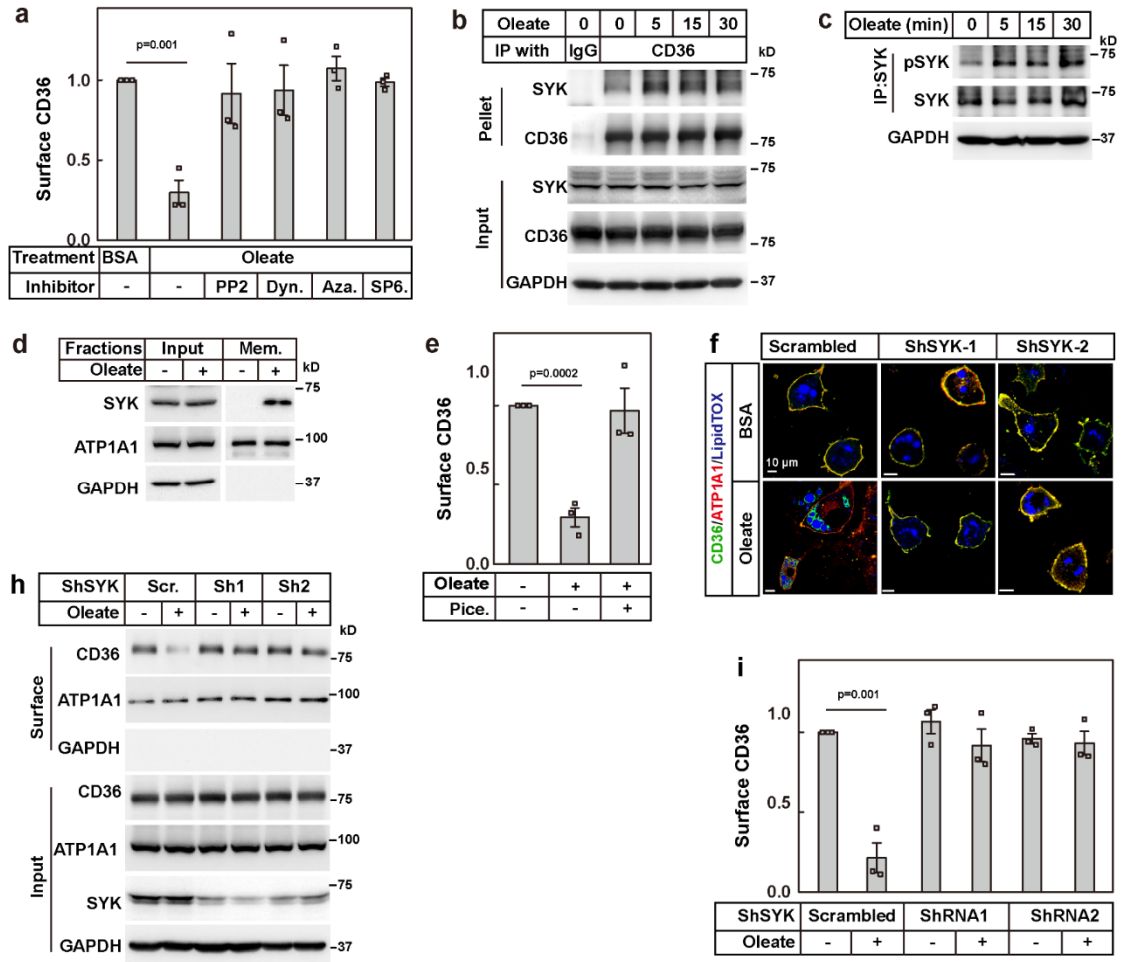

### Supplementary Figure 6. SYK is required for oleate-induced internalization of CD36

**a**, Quantification of surface CD36 content in Fig. 6b. Each value represents mean  $\pm$  SEM from 3 independent experiments. The value in BSA-treated cells was normalized to 1.0. Two-sided Student's t test was performed. **b**, 3T3-L1 adipocytes were pretreated and treated with BSA-conjugated oleate (100  $\mu$ M) for indicated. Cells were harvested for immunoprecipitation with anti-CD36 and blotted with indicated antibodies. **c**, 3T3-L1 adipocytes were pretreated and treated as in (b). Cells were harvested, subjected to immunoprecipitation with anti-SYK antibody, and blotted with anti-SYK

and anti-pSYK (Y525/526). **d**, 3T3-L1 adipocytes were pretreated and treated with BSA-conjugated oleate (100  $\mu$ M) for 5 min. Cells were harvested and membrane fractions were collected for immunoblotting using the indicated antibodies. **e**, Quantification of surface CD36 content in Fig. 6h. Each value represents mean  $\pm$  SEM from 3 independent experiments. The value in BSA-treated cells was normalized to 1.0. Two-sided Student's t test was performed. **f-i**, Control and SYK knockdown cells were pretreated and treated with oleate as in Fig. 3b. Cells were harvested for immunostaining (**f**) and surface biotinylation (**h,i**) assays. **i**, Quantification of surface CD36 content in Fig. 6b. Each value represents mean  $\pm$  SEM from 3 independent experiments. The value in BSA-treated cells was normalized to 1.0. Two-sided Student's t test was performed between BSA- and oleate-treated cells. These experiments were repeated at least twice. Source data are provided as a Source Data file.

## Supplementary Figure 7

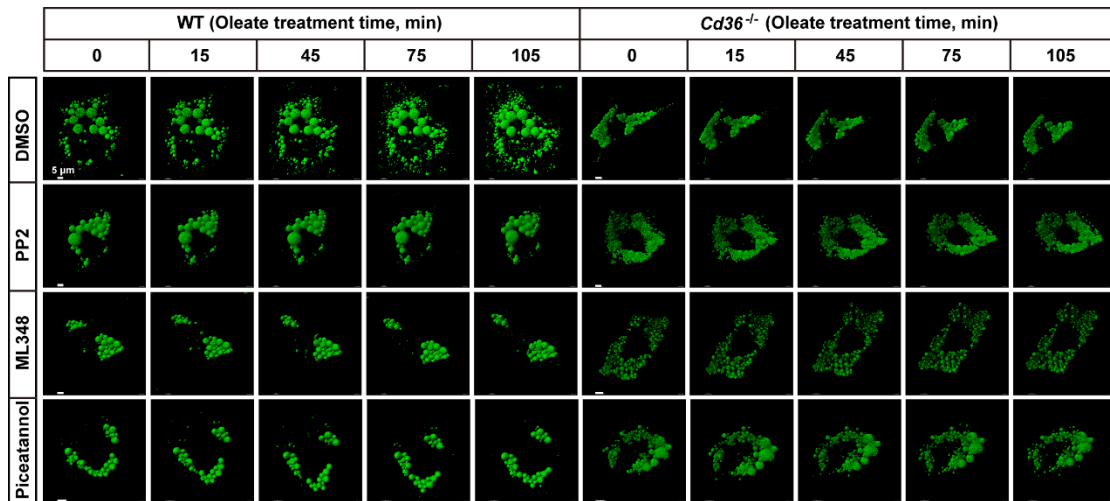

**Supplementary Figure 7. Block endocytosis inhibits CD36-dependent lipid droplet growth**

Representative images of Fig. 7a. Images were reconstructed with Imaris 9.2.0. Scale bar, 5  $\mu$ m. This experiment was repeated twice.

Supplementary Figure 8

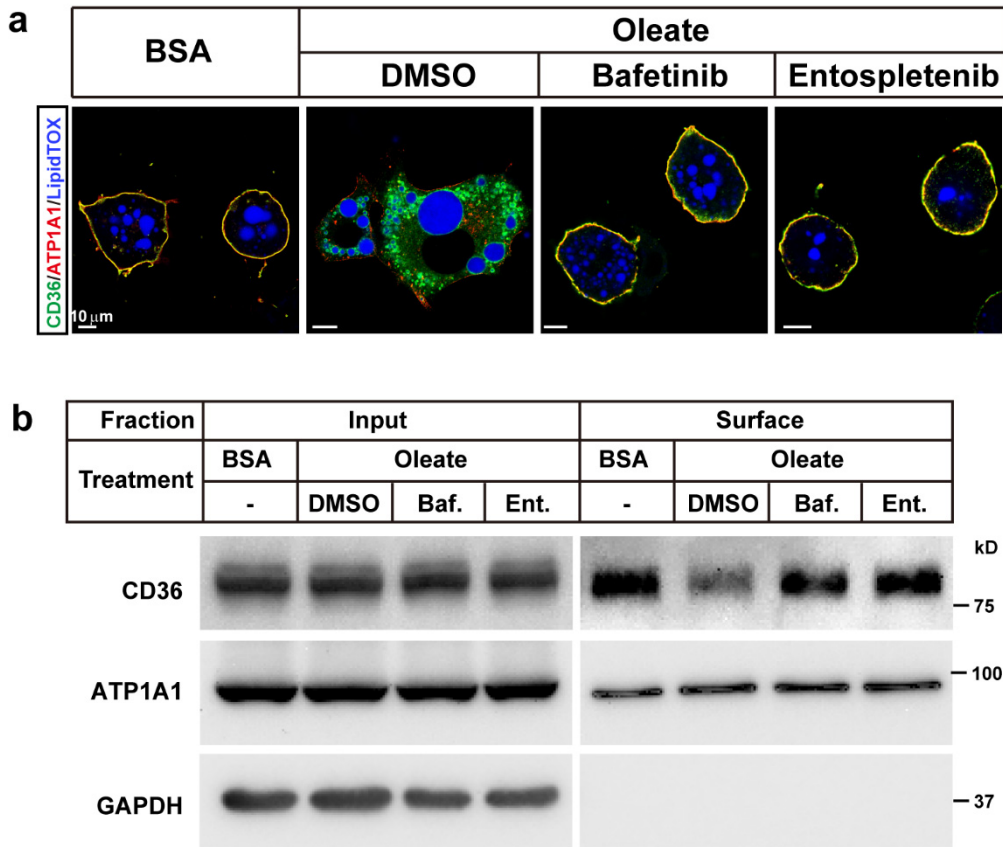

**Supplementary Figure 8. Bafetinib and entospletinib blocks oleate-induced endocytosis of CD36**

**a, b,** 3T3-L1 adipocytes were set up, pretreated and treated as in Fig. 6A, except that cells were pretreated with bafetinib (Baf., 10  $\mu$ M) or entospletinib (Ent., 5  $\mu$ M) for 1 hr. Cells were harvested for immunostaining (a) and surface biotinylation (b). This experiment was repeated twice. Source data are provided as a Source Data file.

### Supplementary Figure 9

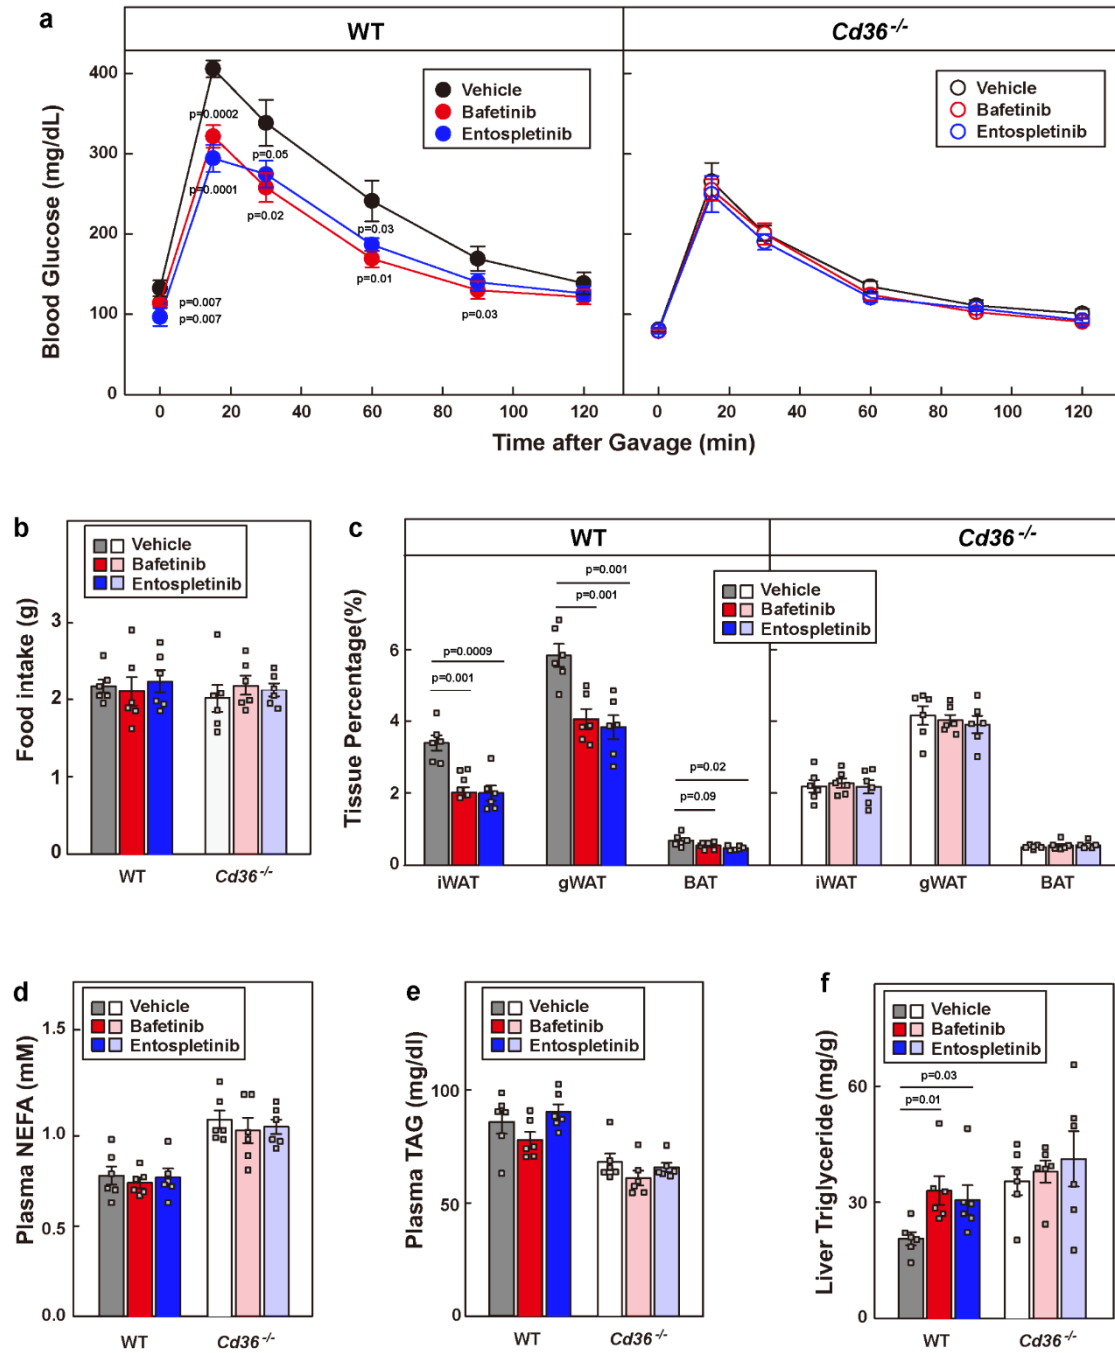

### Supplementary Figure 9. Blocking the endocytosis protects mice from HFD-induced obesity

**a-f**, The mice used in this experiment were the same with Fig. 7b. **a**, On week 8, mice were fasted from 5 pm to 9 am for 16 hr, and orally gavaged with glucose at 1 mg/kg body weight. Blood glucose levels were measured at indicated time from the tail vein.

Two-sided Student's t test was performed between vehicle- and bafetinib or entospletinib-treated cells. **b**, Mice were housed individually for 2 days before food intake measurement for another 4 days. For each mouse, the food intake was a mean from the 4-day experiment. **c**, Tissues were collected and the percentage of each tissue to body weight was plotted. **d-f**, At the end of the experiment, plasma non-esterified fatty acids (d), plasma triglyceride (e) and liver triglyceride (f) were measured. **a-f**, Each value represents mean  $\pm$  SEM from 6 mice. Two-sided Student's t test was performed. This experiment was repeated twice. Source data are provided as a Source Data file.

**Supplementary Table 1. Primer information**

| Primers                                            | Source of Primer sequences                       |
|----------------------------------------------------|--------------------------------------------------|
| <b>A. Primers to generate different constructs</b> |                                                  |
| mLYN-F                                             | CAGA GCTAGCATGGGATGTATTAATCAAAAAG                |
| mLYN-R                                             | TCTGCTCGAGCGGTTGCTGCTGATACTGCCC                  |
| hDHHC5-F                                           | CAGAGAATTCATGCCCCGAGAGTCTGGAAAG                  |
| hDHHC5-R                                           | GCTGGGATCC CACCGAAATC TCATAGGTGG                 |
| hDHHC5-Y91E-F                                      | GCTCCCCTTGAGAAAACAGTGGAGATAAAGGG                 |
| hDHHC5-Y91E-R                                      | CACTGTTTTCTCAAGGGGAGCTCGGAAATCATC                |
| hDHHC5-Y91F-F                                      | GCTCCCCTTTTCAAACAGTGGAGATAAAGGG                  |
| hDHHC5-Y91F-R                                      | CACTGTTTTGAAAAGGGGAGCTCGGAAATCATC                |
| mAPT1-shRNA1                                       | CCCTAATGTTTGGTTCTCTTA                            |
| mAPT1-shRNA2                                       | GCAGGAAATGATGGATGTCAA                            |
| mABHD17A-shRNA1                                    | GAAGAACCTCTATGCTGACAT                            |
| mABHD17B-shRNA1                                    | GCATTCCCAAACATTGACAAA                            |
| mABHD17C-shRNA1                                    | GCACAGTACCTAGAACGACTA                            |
| m APT2-shRNA                                       | GAGAACATCAAGGCTTTGATT                            |
| hAPT1-shRNA1                                       | CTATGCCTTCATGGTTTGATA                            |
| hAPT1-shRNA2                                       | CTATGCCTTCATGGTTTGATA                            |
| mCAV1-shRNA                                        | GCTTCCTGATTGAGATTCAGT                            |
| mCD36-shRNA                                        | CGGATCTGAAATCGACCTTAA                            |
| mLYN-shRNA1                                        | CGCGAGAGTCATCGAAGATAA                            |
| mLYN-shRNA2                                        | CGCGAGAGTCATCGAAGATAA                            |
| mSRC-shRNA                                         | CCTAAATGTGAAACACTACAA                            |
| mYES1-shRNA                                        | GCTGCTCTGTATGGTCGATTT                            |
| mFYN-shRNA                                         | CCTGTATGGAAGGTTCACAAT                            |
| mSYK-shRNA1                                        | GCAGCAGAACAGGCACATTAA                            |
| mSYK-shRNA2                                        | GGAAGTGGAGGCTTCGCAATTA                           |
| <b>B. Quantitative real-time PCR Primers</b>       |                                                  |
| <i>mLypla1</i>                                     | TTTTCCTTCACGGATTGGGAG;<br>GGGGACTTTTGATACCTGCAA  |
| <i>mLypla2</i>                                     | ATGTGTGGTAACACCATGTCTG;<br>ACTCAGCCCCATCAGGTCAA  |
| <i>mAbhd17a</i>                                    | CTCCCGATCCCACCTACTCTC;<br>GGCCGTACTGGAAGTCAGC    |
| <i>mAbhd17b</i>                                    | TGGCCTCGCATTGTTTGAG;<br>TTCTGTGACACGAACTGTTTTA   |
| <i>mAbhd17c</i>                                    | TCTTACGACTACTCGGGCTATG;<br>CAACACGCAAACCAGACATCA |
| <i>mLyn</i>                                        | GTGACATTGTGGTGGCCTTAT;<br>ACCATTCCCATGCTCTTCTA   |
| <i>mSrc</i>                                        | GAACCCGAGAGGGACCTTC;<br>GAGGCAGTAGGCACCTTTTGT    |



|              |                                                   |
|--------------|---------------------------------------------------|
| <i>mYes1</i> | AGTCCAGCCATAAAATACACACC;<br>TGATGCTCCCTTTGTGGAAGA |
| <i>mFyn</i>  | ACCTCCATCCC GAACTACAAC;<br>CGCCACAAACAGTG TCACTC  |
